# Supplementary material
Source: PubMed Central journal article supplement (PMC5621905)
Supplement: jciinsight-2-94263-s001.pdf [file jciinsight-2-94263-s001.pdf]

**Supplemental data for manuscript:**

**Post B cell depletion autoantibody-producing plasmablasts identified in muscle-specific kinase myasthenia gravis.**

Panos Stathopoulos; Aditya Kumar; Richard J. Nowak, and Kevin C. O'Connor.

Department of Neurology, Yale School of Medicine, New Haven, CT 06511, USA

**Contents:**

**Table S1.** Fractions of B cells (% of total PBMCs) and memory B cells (% of total B cells) in MuSK MG patients pre- and post-rituximab

**Table S2.** MuSK cell based assay (CBA) results

Table S1. Fractions of B cells (% of total PBMCs) and memory B cells (% of total B cells) in MuSK MG patients pre- and post-rituximab

|                        | Time point                                        | B cells (%) | Memory B cells (%) |
|------------------------|---------------------------------------------------|-------------|--------------------|
| MuSK 1 (1 cycle)       | Pre-RTX                                           | 14          | ND                 |
|                        | 4 mo post-RTX                                     | 0.3         | ND                 |
|                        | 19 mo post-RTX <sup>A</sup>                       | 11.0        | 2.3                |
| MuSK 2 (1 cycle)       | 65 mo post-RTX                                    | 3.5         | 8.2                |
|                        | 76 mo post-RTX <sup>A</sup>                       | 3.6         | 11.0               |
|                        | 77 mo post-RTX                                    | 5.5         | 8.5                |
|                        | 78 mo post-RTX <sup>A</sup>                       | 13.0        | 5.4                |
| MuSK 3 (2 cycles Q6mo) | Pre-RTX                                           | 16.2        | 26.2               |
|                        | 3 mo post-1 <sup>st</sup> cycle RTX               | <0.1        | 24.0               |
|                        | 6 mo post-2 <sup>nd</sup> cycle RTX               | 0.3         | 23.3               |
|                        | 9 mo post-2 <sup>nd</sup> cycle RTX               | 0.8         | ND                 |
|                        | 21 mo post-2 <sup>nd</sup> cycle RTX <sup>A</sup> | 1.0         | 17.9               |
| MuSK 4 (1 cycle)       | 36 mo post-RTX                                    | 14.4        | 1.2                |
|                        | 72 mo post-RTX                                    | 16.0        | 1.2                |
|                        | 84 mo post-RTX                                    | 41.0        | 1.0                |

<sup>A</sup>: time point at which experimental sample was obtained, MuSK: muscle-specific tyrosine kinase, ND: not done, PBMC: peripheral blood mononuclear cells, RTX: rituximab,

Table S2. MuSK cell based assay (CBA) results

| Sample/subject        | Source                                   | $\Delta\%$ positive cells <sup>A</sup> | $\Delta$ MFI <sup>B</sup> |
|-----------------------|------------------------------------------|----------------------------------------|---------------------------|
| Control               | Murine humanized MuSK monoclonal rlg 4A3 | 96                                     | 118554                    |
| Control               | Human AChR monoclonal rlg 637            | 2                                      | 54                        |
| Control               | Culture medium                           | 1                                      | 57                        |
| Control               | 1% BSA in PBS                            | 1                                      | 72                        |
| MuSK 1                | Serum                                    | <b>95</b>                              | 6769                      |
| MuSK 2a               | Serum                                    | <b>94</b>                              | 8387                      |
| MuSK 2b               | Serum                                    | <b>97</b>                              | 11960                     |
| MuSK 3                | Serum                                    | <b>73</b>                              | 1002                      |
| MuSK 4                | Serum                                    | 1                                      | 13                        |
| AChR 1                | Serum                                    | 2                                      | 24                        |
| AChR 2                | Serum                                    | 8                                      | 48                        |
| AChR 3                | Serum                                    | 11                                     | 81                        |
| AChR 4                | Serum                                    | 11                                     | 64                        |
| AChR 5                | Serum                                    | 22                                     | 102                       |
| AChR 6                | Serum                                    | 0                                      | 0                         |
| AChR 7                | Serum                                    | 6                                      | 52                        |
| AChR 8                | Serum                                    | 4                                      | 31                        |
| HD1                   | Serum                                    | 0                                      | 11                        |
| MuSK 1 <sup>C</sup>   | CD27 <sup>+</sup> cell culture           | <b>77</b>                              | 558                       |
| MuSK 2a <sup>D</sup>  | CD27 <sup>+</sup> cell culture           | <b>84</b>                              | 1643                      |
| MuSK 2b <sup>C</sup>  | CD27 <sup>+</sup> cell culture           | <b>64</b>                              | 635                       |
| MuSK 3 <sup>C</sup>   | CD27 <sup>+</sup> cell culture           | <b>32</b>                              | 164                       |
| MuSK 4 <sup>C,D</sup> | CD27 <sup>+</sup> cell culture           | 2                                      | 29                        |
| AChR 1                | CD27 <sup>+</sup> cell culture           | 1                                      | 15                        |
| AChR 2                | CD27 <sup>+</sup> cell culture           | 0                                      | 11                        |
| AChR 3                | CD27 <sup>+</sup> cell culture           | 16                                     | 94                        |
| AChR 4 <sup>C</sup>   | CD27 <sup>+</sup> cell culture           | 0                                      | 15                        |
| AChR 5 <sup>C</sup>   | CD27 <sup>+</sup> cell culture           | 12                                     | 151                       |
| AChR 6 <sup>D</sup>   | CD27 <sup>+</sup> cell culture           | 0                                      | 109                       |
| HD1                   | CD27 <sup>+</sup> cell culture           | 1                                      | 14                        |
| MuSK 1 <sup>C</sup>   | Plasmablast culture                      | <b>47</b>                              | <b>267</b>                |
| MuSK 2b <sup>D</sup>  | Plasmablast culture                      | <b>30</b>                              | <b>193</b>                |
| MuSK 3 <sup>C</sup>   | Plasmablast culture                      | <b>11</b>                              | <b>125</b>                |
| MuSK 4 <sup>C,D</sup> | Plasmablast culture                      | 0                                      | <b>9</b>                  |
| AChR 1 <sup>D</sup>   | Plasmablast culture                      | 3                                      | 55                        |
| AChR 2 <sup>D</sup>   | Plasmablast culture                      | 2                                      | 47                        |
| AChR 3 <sup>D</sup>   | Plasmablast culture                      | 0                                      | 40                        |
| HD 1 <sup>D</sup>     | Plasmablast culture                      | 2                                      | 58                        |

|                     |               |           |     |
|---------------------|---------------|-----------|-----|
| MuSK 1 <sup>c</sup> | MuSK 1-1 rlg  | <b>53</b> | 771 |
| MuSK 1 <sup>c</sup> | MuSK 1-2 rlg  | 2         | 30  |
| MuSK 1 <sup>c</sup> | MuSK 1-3 rlg  | 7         | 146 |
| MuSK 1 <sup>c</sup> | MuSK 1-4 rlg  | 3         | 138 |
| MuSK 2b             | MuSK 2-1 rlg  | 11        | 50  |
| MuSK 2b             | MuSK 2-2 rlg  | 1         | 30  |
| MuSK 2b             | MuSK 2-3 rlg  | 12        | 55  |
| MuSK 2b             | MuSK 2-4 rlg  | 1         | 29  |
| MuSK 2b             | MuSK 2-5 rlg  | 3         | 43  |
| MuSK 2b             | MuSK 2-6 rlg  | 12        | 68  |
| MuSK 2b             | MuSK 2-7 rlg  | 4         | 37  |
| MuSK 2b             | MuSK 2-8 rlg  | 18        | 94  |
| MuSK 2b             | MuSK 2-9 rlg  | 1         | 24  |
| MuSK 2b             | MuSK 2-10 rlg | 4         | 47  |
| MuSK 2b             | MuSK 2-11 rlg | 1         | 27  |
| MuSK 2b             | MuSK 2-12 rlg | 0         | 22  |
| MuSK 2b             | MuSK 2-13 rlg | 6         | 7   |
| MuSK 2b             | MuSK 2-14 rlg | 0         | 42  |
| MuSK 2b             | MuSK 2-15 rlg | 3         | 23  |
| MuSK 2b             | MuSK 2-16 rlg | 14        | 125 |
| MuSK 2b             | MuSK 2-17 rlg | 3         | 12  |
| MuSK 2b             | MuSK 2-18 rlg | 2         | 19  |
| MuSK 2b             | MuSK 2-19 rlg | 5         | 37  |
| MuSK 2b             | MuSK 2-20 rlg | 12        | 57  |
| MuSK 2b             | MuSK 2-21 rlg | 14        | 80  |
| MuSK 2b             | MuSK 2-22 rlg | 6         | 12  |
| MuSK 2b             | MuSK 2-23 rlg | 20        | 185 |
| MuSK 2b             | MuSK 2-24 rlg | 3         | 15  |
| MuSK 2b             | MuSK 2-25 rlg | 7         | 9   |
| MuSK 2b             | MuSK 2-26 rlg | 11        | 27  |
| MuSK 2b             | MuSK 2-27 rlg | 2         | 20  |
| MuSK 2b             | MuSK 2-28 rlg | 2         | 30  |
| MuSK 2b             | MuSK 2-29 rlg | 13        | 67  |
| MuSK 2b             | MuSK 2-30 rlg | 7         | 10  |
| MuSK 2b             | MuSK 2-31 rlg | 2         | 29  |
| MuSK 2b             | MuSK 2-32 rlg | 10        | 51  |
| MuSK 2b             | MuSK 2-33 rlg | 9         | 47  |
| MuSK 3 <sup>c</sup> | MuSK 3-1 rlg  | <b>22</b> | 201 |
| MuSK 3 <sup>c</sup> | MuSK 3-2 rlg  | 13        | 111 |
| MuSK 3 <sup>c</sup> | MuSK 3-3 rlg  | 7         | 170 |
| MuSK 3 <sup>c</sup> | MuSK 3-4 rlg  | 1         | 122 |
| MuSK 3 <sup>c</sup> | MuSK 3-5 rlg  | 7         | 11  |

|                     |               |           |        |
|---------------------|---------------|-----------|--------|
| MuSK 3 <sup>c</sup> | MuSK 3-6 rlg  | 17        | 124    |
| MuSK 3 <sup>c</sup> | MuSK 3-7 rlg  | 4         | 81     |
| MuSK 3 <sup>c</sup> | MuSK 3-8 rlg  | 9         | 213    |
| MuSK 3 <sup>c</sup> | MuSK 3-9 rlg  | 3         | 10     |
| MuSK 3 <sup>c</sup> | MuSK 3-10 rlg | 1         | 42     |
| MuSK 3 <sup>c</sup> | MuSK 3-11 rlg | 2         | 17     |
| MuSK 3 <sup>c</sup> | MuSK 3-12 rlg | 0         | 14     |
| MuSK 3 <sup>c</sup> | MuSK 3-13 rlg | 6         | 21     |
| MuSK 3 <sup>c</sup> | MuSK 3-14 rlg | 1         | 25     |
| MuSK 3 <sup>c</sup> | MuSK 3-15 rlg | 9         | 8      |
| MuSK 3 <sup>c</sup> | MuSK 3-16 rlg | 7         | 40     |
| MuSK 3 <sup>c</sup> | MuSK 3-17 rlg | 0         | 4      |
| MuSK 3 <sup>c</sup> | MuSK 3-18 rlg | 7         | 13     |
| MuSK 3 <sup>c</sup> | MuSK 3-19 rlg | 20        | 684    |
| MuSK 3 <sup>c</sup> | MuSK 3-20 rlg | <b>32</b> | 484    |
| MuSK 3 <sup>c</sup> | MuSK 3-21 rlg | 9         | 13     |
| MuSK 3 <sup>c</sup> | MuSK 3-22 rlg | 8         | 26     |
| MuSK 3 <sup>c</sup> | MuSK 3-23 rlg | 9         | 13     |
| MuSK 3 <sup>c</sup> | MuSK 3-24 rlg | 6         | 54     |
| MuSK 3 <sup>c</sup> | MuSK 3-25 rlg | 2         | 18     |
| MuSK 3 <sup>c</sup> | MuSK 3-26 rlg | 3         | 21     |
| MuSK 3 <sup>c</sup> | MuSK 3-27 rlg | 14        | 190    |
| MuSK 3 <sup>c</sup> | MuSK 3-28 rlg | <b>99</b> | 114666 |
| MuSK 3 <sup>c</sup> | MuSK 3-29 rlg | <b>86</b> | 2531   |
| MuSK 3 <sup>c</sup> | MuSK 3-30 rlg | <b>82</b> | 2842   |
| MuSK 3 <sup>c</sup> | MuSK 3-31 rlg | 8         | 25     |
| MuSK 3 <sup>c</sup> | MuSK 3-32 rlg | 0         | 0      |
| MuSK 3 <sup>c</sup> | MuSK 3-33 rlg | <b>87</b> | 27952  |
| MuSK 3 <sup>c</sup> | MuSK 3-34 rlg | 3         | 23     |
| MuSK 3 <sup>c</sup> | MuSK 3-35 rlg | 4         | 21     |
| MuSK 3 <sup>c</sup> | MuSK 3-36 rlg | 16        | 90     |
| MuSK 3 <sup>c</sup> | MuSK 3-37 rlg | 0         | 5      |
| MuSK 3 <sup>c</sup> | MuSK 3-38 rlg | 3         | 21     |
| MuSK 3 <sup>c</sup> | MuSK 3-39 rlg | 4         | 20     |
| MuSK 3 <sup>c</sup> | MuSK 3-40 rlg | 12        | 87     |
| MuSK 3 <sup>c</sup> | MuSK 3-41 rlg | 13        | 75     |
| MuSK 3 <sup>c</sup> | MuSK 3-42 rlg | 16        | 86     |
| MuSK 3 <sup>c</sup> | MuSK 3-43 rlg | 7         | 24     |
| MuSK 3 <sup>c</sup> | MuSK 3-44 rlg | 5         | 9      |
| MuSK 3 <sup>c</sup> | MuSK 3-45 rlg | 0         | 2      |
| AChR 7 <sup>c</sup> | AChR 7-1 rlg  | 6         | 27     |
| AChR 7 <sup>c</sup> | AChR 7-2 rlg  | 2         | 31     |

|                     |               |    |    |
|---------------------|---------------|----|----|
| AChR 7 <sup>c</sup> | AChR 7-3 rlg  | 2  | 25 |
| AChR 7 <sup>c</sup> | AChR 7-4 rlg  | 4  | 19 |
| AChR 7 <sup>c</sup> | AChR 7-5 rlg  | 11 | 60 |
| AChR 7 <sup>c</sup> | AChR 7-6 rlg  | 0  | 21 |
| AChR 7 <sup>c</sup> | AChR 7-7 rlg  | 0  | 17 |
| AChR 7 <sup>c</sup> | AChR 7-8 rlg  | 2  | 51 |
| AChR 7 <sup>c</sup> | AChR 7-9 rlg  | 13 | 89 |
| AChR 7 <sup>c</sup> | AChR 7-10 rlg | 4  | 48 |
| AChR 7 <sup>c</sup> | AChR 7-11 rlg | 11 | 59 |
| AChR 7 <sup>c</sup> | AChR 7-12 rlg | 7  | 47 |
| AChR 7 <sup>c</sup> | AChR 7-13 rlg | 0  | 7  |
| AChR 7 <sup>c</sup> | AChR 7-14 rlg | 4  | 34 |
| AChR 7 <sup>c</sup> | AChR 7-15 rlg | 3  | 42 |
| AChR 8 <sup>c</sup> | AChR 8-1 rlg  | 11 | 74 |
| AChR 8 <sup>c</sup> | AChR 8-2 rlg  | 3  | 42 |
| AChR 8 <sup>c</sup> | AChR 8-3 rlg  | 2  | 39 |
| AChR 8 <sup>c</sup> | AChR 8-4 rlg  | 3  | 46 |
| AChR 8 <sup>c</sup> | AChR 8-5 rlg  | 3  | 45 |
| AChR 8 <sup>c</sup> | AChR 8-6 rlg  | 11 | 67 |
| AChR 8 <sup>c</sup> | AChR 8-7 rlg  | 7  | 38 |
| AChR 8 <sup>c</sup> | AChR 8-8 rlg  | 3  | 34 |
| AChR 8 <sup>c</sup> | AChR 8-9 rlg  | 3  | 30 |
| AChR 8 <sup>c</sup> | AChR 8-10 rlg | 0  | 17 |
| AChR 8 <sup>c</sup> | AChR 8-11 rlg | 13 | 67 |

Bold characters indicate positives, the values of which were greater than the mean + 4SD of the control (AChR, HD1) specimens. Testing of all samples was performed in duplicate; the mean of duplicate experiments is reported. <sup>A</sup>:  $\Delta\%$  positive cells = (%frequency of positive MuSK-GFP-transfected cells/%frequency of MuSK-GFP-transfected cells) – (%frequency of positive GFP-transfected cells/%frequency of GFP-transfected cells), <sup>B</sup>:  $\Delta$ MFI = Alexa Fluor 647 median fluorescence intensity in MuSK-GFP-transfected cells minus Alexa Fluor 647 median fluorescence intensity in GFP-transfected cells, <sup>C</sup>: from previously cryopreserved cells, <sup>D</sup>: specimen was not sufficient to perform duplicate experiments, AChR: acetylcholine receptor, HD: healthy donor, MuSK: muscle-specific tyrosine kinase, rlg: recombinant immunoglobulin.
